# Supplementary material for: Association of Hispanic ethnicity and linguistic acculturation with cardiovascular medication adherence in patients with suspected acute coronary syndrome
Source: PubMed Central journal article supplement — Prev Med Rep. 2021 Jun 17;23:101455. doi: 10.1016/j.pmedr.2021.101455 (PMC8237356; doi:10.1016/j.pmedr.2021.101455), 2021-06-17
Supplement: mmc1.pdf [file mmc1.pdf]

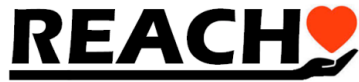

**REACTIONS TO ACUTE CARE AND HOSPITALIZATIONS (REACH) STUDY**  
**Adherence Monitoring**

**Instructions for using eCAPs**

1. With your thumb, push down on the bottle safety tab, and turn the eCAP to the left to remove the cap

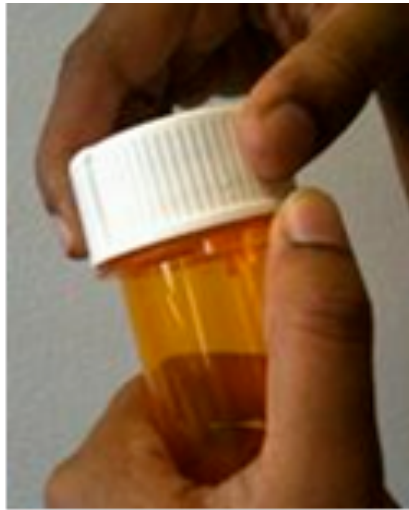

2. Place the heart medication you were prescribed by your doctor in the eCAP bottle
3. Close the eCAP bottle by turning the cap to the right
4. Take your medication as prescribed by your doctor

*\* As with all medications bottles, please be sure to keep it in a safe place out of the reach of children \**

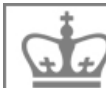

Columbia University IRB

IRB-AAAM0355

IRB Approval Date: 10/29/2014  
for use until: 05/29/2015
